# Supplementary material
Source: PubMed Central journal article supplement (PMC10756926)
Supplement: NIHMS1937615-supplement-Supplemental_appendix.pdf [file NIHMS1937615-supplement-Supplemental_appendix.pdf]

## Glossary of Terms

| Term                                         | Definition                                                                                                                                                                                                                                                                                                                        |
|----------------------------------------------|-----------------------------------------------------------------------------------------------------------------------------------------------------------------------------------------------------------------------------------------------------------------------------------------------------------------------------------|
| Behavioral health                            | Includes mental health and substance use disorders. As a discipline, encompasses a continuum of prevention, intervention, treatment, and recovery support services                                                                                                                                                                |
| Certified Community Behavioral Health Clinic | Government designated entities that provide a comprehensive array of services that create access, stabilize people in crisis, and provide necessary treatment for patients with complex mental illnesses and addiction disorders                                                                                                  |
| Community Mental Health Program              | In Oregon, an entity that is responsible for planning and delivery of a variety of clinical and rehabilitative safety net services for individuals with mental health diagnoses or addiction disorders. Operates in a specific geographic area under contract with the Oregon Health Authority or a local mental health authority |
| Federally Qualified Health Center            | Government designated safety net entities that provide a comprehensive array of primarily outpatient services. Must meet certain requirements to qualify and receive funding and/or enhanced Medicaid reimbursement                                                                                                               |
| Non-profit association                       | Statewide non-profit focused on advocacy with professional representation across a range of disciplines, work settings, and geographic locations                                                                                                                                                                                  |
| Peer-delivered services                      | Community-based services and supports provided by peer providers to individuals with similar lived experience. Intended to support individuals to engage in ongoing treatment and to live successfully in the community                                                                                                           |
| Provider                                     | An individual who delivers services, as opposed to agencies or group practices                                                                                                                                                                                                                                                    |
| Public behavioral health system              | System that is funded in part or in full through public financing such as Medicaid, or local, state, or federal grants. Includes community health clinics, community-based organizations, schools, jails, and other entities                                                                                                      |
| Recovery-support non-profit                  | Community-based non-profit that provides peer-delivered services, various wellness programs, recovery support, and drop-in centers. Often dependent on philanthropic or grant funding as opposed to reimbursement for clinical services                                                                                           |
| Serious mental illness                       | A mental, behavioral, or emotional disorder causing serious functional impairment. May include schizophrenia and schizoaffective disorder, bipolar disorder, and major depressive disorder.                                                                                                                                       |
